# Supplementary material
Source: publisher site journal article supplement (https://www.dovepress.com/article/386342)

# Supplementary Table Legends

Supplementary Table 1 Univariate and Multivariate Analysis of Factors Related to Over 60-day Survivals in Different Subgroups

Supplementary Table 2 Univariate and Multivariate Analysis of Factors Related to Over 30-day Survivals

Supplementary Table 3 Univariate and Multivariate Analysis of Factors Related to Over 90-day Survivals

# Supplementary Figure Legends

Supplementary Figure 1 Distribution of bloodstream infection according to 60-day survivals and 60-day death stratifications: A. different inducement of infection; B. resources of infectious etiologies

Supplementary Figure 2 Antibiotic regimen of carbapenem-resistant Gram-negative bloodstream infections in immunosuppressive patients

Supplementary Figure 3 Distribution of infectious microorganisms of bloodstream infection according to 60-day survivals and 60-day death stratifications (A); Proportion of types of infectious microorganisms of bloodstream infection with 60-day survivals (Total=203) ; (B) Proportion of infectious microorganisms of bloodstream infection with 60-day death(Total=224) ; (C) *Enterococcus, Klebsiella pneumoniae* (KPN), *Acinetobacter* *baumannii* (ABA), *Escherichia Coli* (ECO), *Enterobacter cloacae*(ECL) , *Pseudomonas aeruginosa* (PAE)

| **Supplementary Table 1 Univariate and Multivariate Analysis of Factors Related to Over 60-day Survivals in Different Subgroups 2** | | | | | | |
| --- | --- | --- | --- | --- | --- | --- |
|  | | Univariate analysis | | | Multivariate analysis | |
| **AKI Subgroup** | OR (95%CI) | | P Value | OR (95%CI) | | P Value |
| PCT>0.5 ug/L | 10.50 (2.37,46.60) | | 0.002 | 6.98 (1.08,45.17) | | 0.042 |
| Hypoproteinemia | 5.75 (1.23,26.86) | | 0.026 | NA | | 0.480 |
| Hyperlipidemia | 0.15 (0.02,0.87) | | 0.035 | NA | | 0.077 |
| Chemotherapy | 0.15 (0.02,0.87) | | 0.035 | 0.05 (0.00,0.84) | | 0.038 |
| Shock | 4.65 (1.41,15.28) | | 0.011 | NA | | 0.069 |
| Digestive Tract | 5.75 (1.23,26.86) | | 0.026 | NA | | 0.217 |
| Catheter | 0.15 (0.02,0.87) | | 0.035 | NA | | 0.817 |
| Third Generation Cephalosporin | 0.15 (0.02,0.87) | | 0.035 | NA | | 0.997 |
|  |  | |  |  | |  |
| **Septic Shock Subgroup** | OR (95%CI) | | P Value | OR (95%CI) | | P Value |
| Age>55 years | 3.28 (1.42,7.55) | | 0.005 | 3.58 (1.52,8.47) | | 0.004 |
| AKI | 3.68 (1.19,11.38) | | 0.024 | 4.14 (1.30,13.21) | | 0.017 |
|  |  | |  |  | |  |
| **Burning Subgroup** | OR (95%CI) | | P Value | OR (95%CI) | | P Value |
| Age>55 years | 3.70 (1.43,9.54) | | 0.007 | 3.00 (1.01,8.88) | | 0.047 |
| Hypertension | 4.17 (1.22,14.19) | | 0.022 | NA | | 0.264 |
| MODS | 8.59 (1.79,41.23) | | 0.007 | 8.76 (1.75,43.84) | | 0.008 |
| Tigecycline | 2.12 (1.00,4.48) | | 0.049 | NA | | 0.447 |
|  |  | |  |  | |  |
| **Tumors Subgroup** | OR (95%CI) | | P Value | OR (95%CI) | | P Value |
| Hypertension | 3.05 (1.48,6.28) | | 0.002 | NA | | 0.061 |
| Hypoproteinemia | 3.00 (1.27,7.08) | | 0.012 | NA | | 0.075 |
| Abdominal Infection | 2.32 (1.05,5.09) | | 0.036 | NA | | 0.323 |
| Shock | 7.78 (3.46,17.49) | | <0.001 | 5.21 (2.16,12.56) | | <0.001 |
| CRKP | 2.48 (1.22,5.04) | | 0.012 | NA | | 0.283 |
| Tigecycline | 4.52 (1.89,10.78) | | 0.001 | NA | | 0.054 |
|  |  | |  |  | |  |
| **Tigecycline Subgroup** | OR (95%CI) | | P Value | OR (95%CI) | | P Value |
| Age>55 years | 6.77 (2.64,17.36) | | <0.001 | NA | | 0.072 |
| ICU-Stay | 5.46 (1.93,15.50) | | 0.001 | NA | | 0.589 |
| Hypertension | 7.04 (2.48,19.97) | | <0.001 | NA | | 0.126 |
| Diabetes | 15.27 (1.98,118.02) | | 0.009 | NA | | 0.174 |
| Burning | 0.25 (0.11,0.57) | | 0.001 | NA | | 0.982 |
| Surgery | 3.80 (1.33,10.83) | | 0.013 | NA | | 0.568 |
| AKI | 3.29 (1.04,10.35) | | 0.042 | NA | | 0.832 |
| Shock | 2.90 (1.08,7.79) | | 0.035 | NA | | 0.224 |
| Respiratory Tract | 2.75 (1.02,7.39) | | 0.046 | NA | | 0.670 |
| Skin | 0.37 (0.16,0.86) | | 0.020 | NA | | 0.496 |

| **Supplementary Table 2 Univariate and Multivariate Analysis of Factors Related to Over 30-day Survivals** | | | | |
| --- | --- | --- | --- | --- |
|  | Univariate analysis | | Multivariate analysis | |
|  | OR (95%CI) | P Value | OR (95%CI) | P Value |
| PCT>0.5 ug/L | 2.34 (1.44,3.83) | 0.001 | 2.01 (1.13,3.60) | 0.018 |
| Age>55 years | 1.85 (1.26,2.73) | 0.002 | NA | 0.338 |
| ICU-Stay | 1.92 (1.30,2.83) | 0.001 | NA | 0.211 |
| Hypertension | 2.44 (1.64,3.63) | <0.001 | NA | 0.220 |
| Diabetes | 1.64 (1.06,2.56) | 0.027 | NA | 0.987 |
| Hypoproteinemia | 2.21 (1.05,4.64) | 0.037 | NA | 0.214 |
| Valvular Heart Disease | 0.52 (0.33,0.81) | 0.004 | NA | 0.806 |
| Burning | 1.50 (1.02,2.21) | 0.041 | NA | 0.471 |
| Surgery | 3.65 (1.50,8.88) | 0.004 | 3.19 (1.02,9.93) | 0.045 |
| Catheter Placement | 3.00 (1.82,4.93) | <0.001 | 2.39 (1.30,4.40) | 0.005 |
| AKI | 2.55 (1.20,5.44) | 0.015 | 2.68 (1.05,6.82) | 0.039 |
| Gastrointestinal Bleeding | 3.65 (2.36,5.65) | <0.001 | 3.02 (1.73,5.27) | <0.001 |
| MODS | 1.84 (1.22,2.78) | 0.004 | NA | 0.424 |
| Shock | 2.84 (1.39,5.82) | 0.004 | 2.67 (1.12,6.37) | 0.027 |
| Respiratory Tract | 1.85 (1.20,2.85) | 0.005 | 2.20 (1.30,3.73) | 0.003 |
| Polymyxin | 1.85 (1.26,2.73) | 0.002 | NA | 0.338 |
| Tigecycline | 1.92 (1.30,2.83) | 0.001 | NA | 0.211 |

| **Supplementary Table 3 Univariate and Multivariate Analysis of Factors Related to Over 90-day Survivals** | | | | |
| --- | --- | --- | --- | --- |
|  | Univariate analysis | | Multivariate analysis | |
|  | OR (95%CI) | P Value | OR (95%CI) | P Value |
| PCT>0.5 ug/L | 2.78 (1.71,4.52) | <0.001 | 2.24 (1.22,4.12) | 0.010 |
| Age>55 years | 2.14 (1.43,3.20) | <0.001 | 2.14 (1.17,3.92) | 0.014 |
| ICU-Stay | 2.23 (1.48,3.35) | <0.001 | NA | 0.449 |
| Hypertension | 2.93 (1.90,4.51) | <0.001 | NA | 0.104 |
| Diabetes | 1.76 (1.10,2.84) | 0.020 | NA | 0.857 |
| Coronary Heart Disease | 1.96 (1.04,3.70) | 0.037 | NA | 0.998 |
| Hypoproteinemia | 2.40 (1.33,4.33) | 0.004 | NA | 0.133 |
| Burning | 0.63 (0.40,0.99) | 0.045 | NA | 0.212 |
| AKI | 3.90 (2.13,7.12) | <0.001 | 2.66 (1.27,5.57) | 0.009 |
| Abdominal Infection | 2.29 (1.33,3.95) | 0.003 | NA | 0.709 |
| Gastrointestinal Bleeding | 3.70 (1.38,9.92) | 0.009 | NA | 0.062 |
| MODS | 10.76 (2.52,45.91) | 0.001 | 8.15 (1.74,38.19) | 0.008 |
| Shock | 4.52 (2.73,7.49) | <0.001 | 4.05 (2.10,7.80) | <0.001 |
| Respiratory Tract | 1.63 (1.06,2.52) | 0.026 | NA | 0.692 |
| Polymyxin | 5.76 (1.99,16.73) | 0.001 | 4.57 (1.42,14.74) | 0.011 |
| Tigecycline | 2.47 (1.53,4.01) | <0.001 | 2.85 (1.56,5.19) | 0.001 |


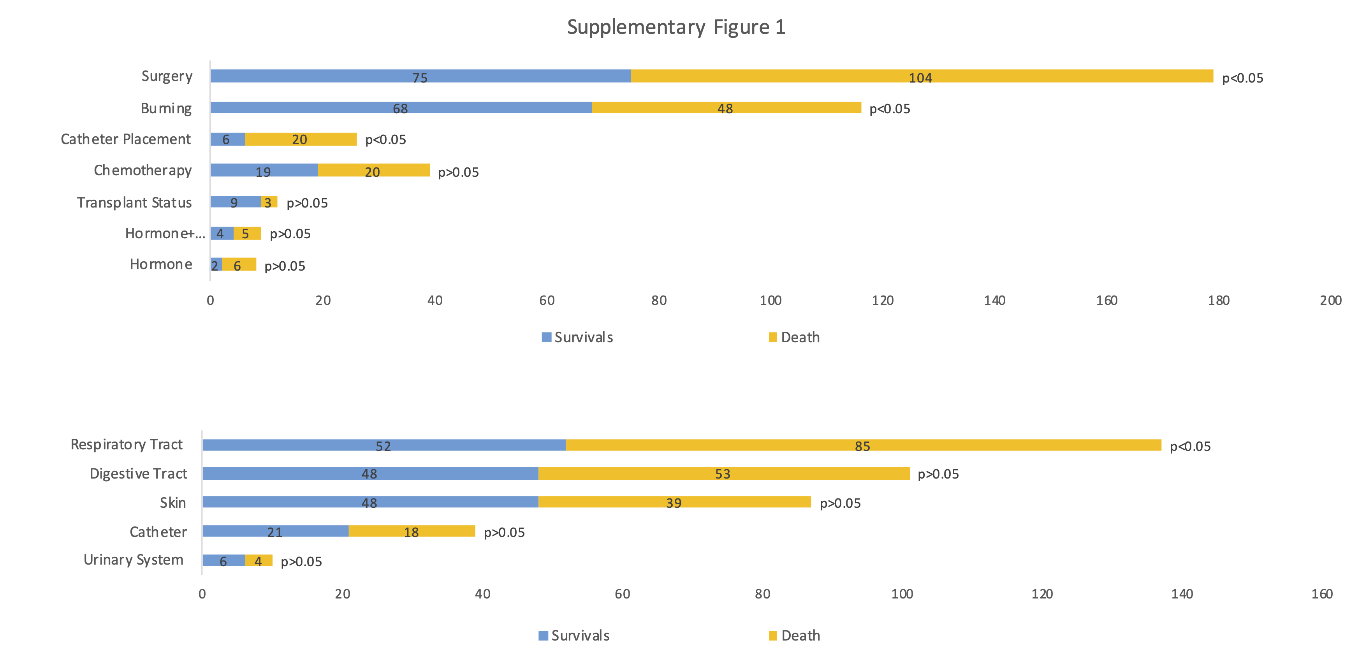


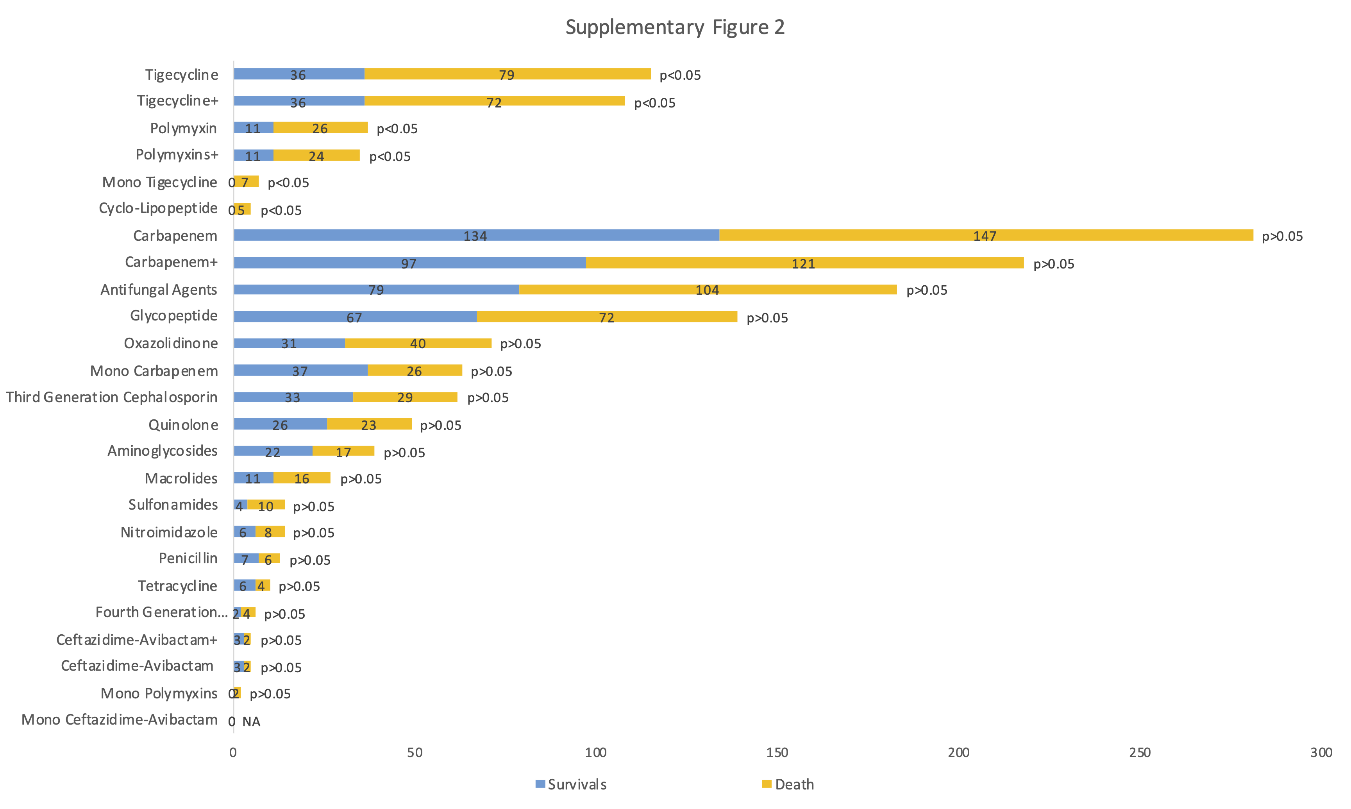


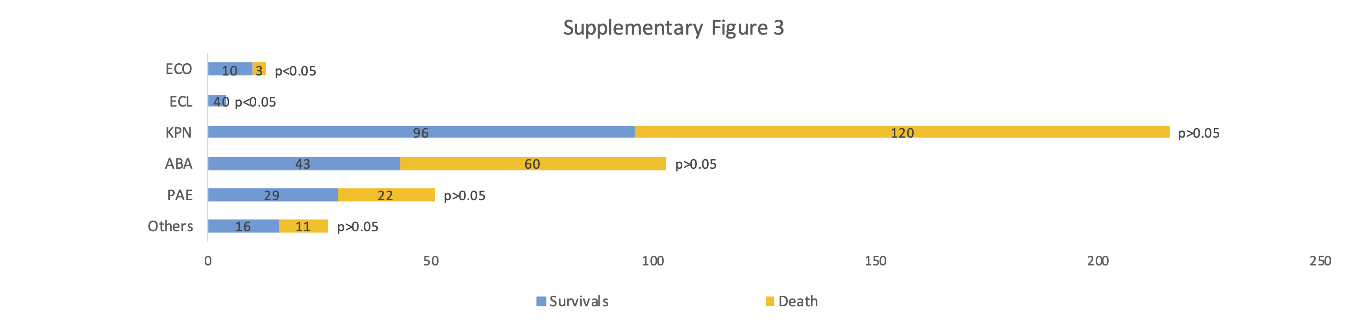

Supplement: Supplementary file 1 [file get_supplementary_file.php]
